# Supplementary material for: Local production of reactive oxygen species drives vincristine-induced axon degeneration
Source: PubMed Central journal article supplement (PMC10709426; doi:10.1038/s41419-023-06227-8), 2023-12-08
Supplement: 41419_2023_6227_MOESM1_ESM.pdf [file 41419_2023_6227_MOESM1_ESM.pdf]

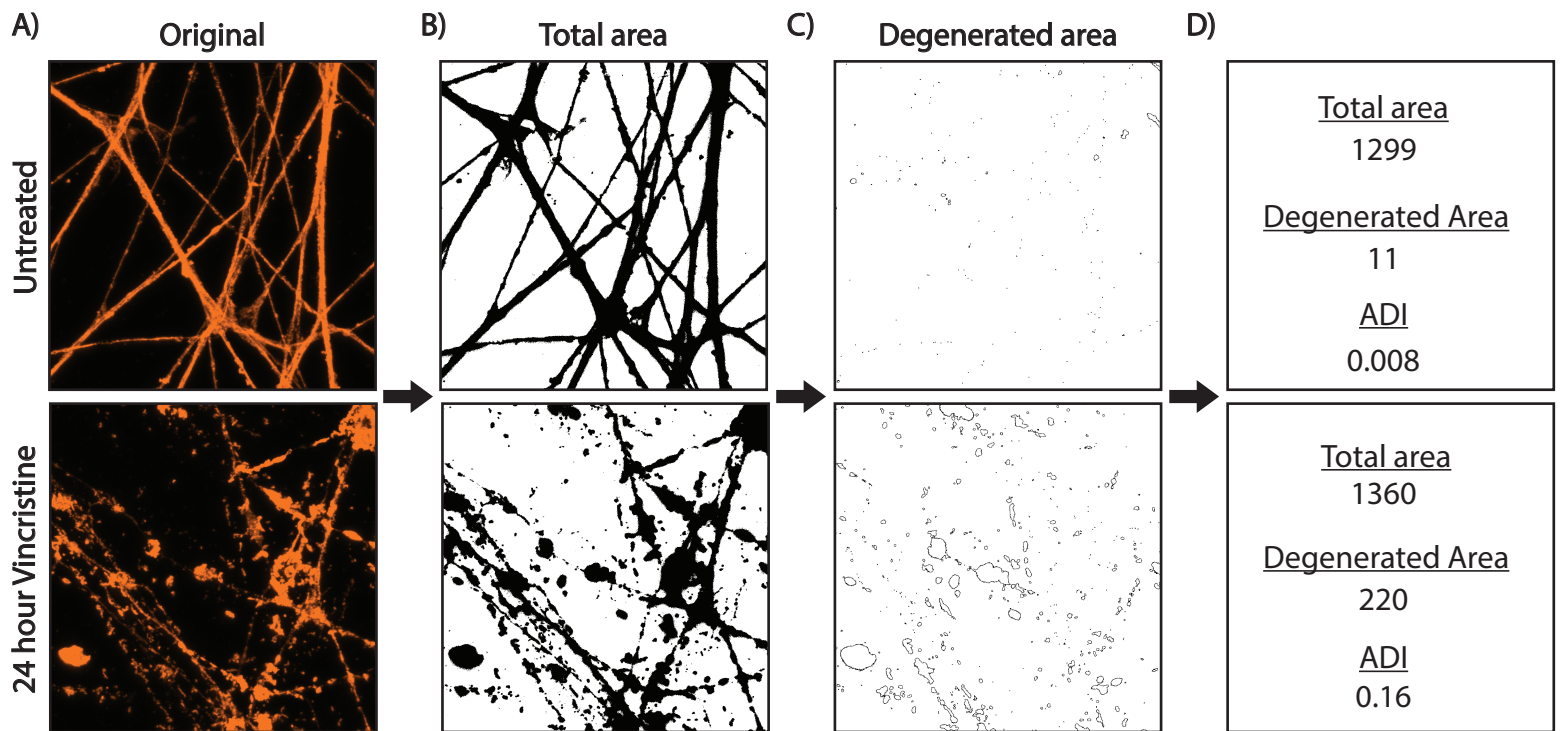

### Supplementary Figure 1: Quantification of axon degeneration index.

- A) Representative original images of untreated axons (top) and 5 nM vincristine-treated axons (bottom).
- B) Original images were binarized and adjusted to a determined threshold in FIJI that was used for all images across biological and technical replicates. Area ( $\text{px}^2$ ) of the black pixels in the binarized image is considered total axonal area.
- C) Binarized images are analyzed for particles with pixel units greater than or equal to 2, with a circularity of greater than or equal to 0.2. Total area of these particles is considered the degenerated area ( $\text{px}^2$ ).
- D) The axon degeneration index = degenerated area/ total axonal area. No differences in the total  $\beta$ III tubulin staining was observed between treated and untreated conditions.

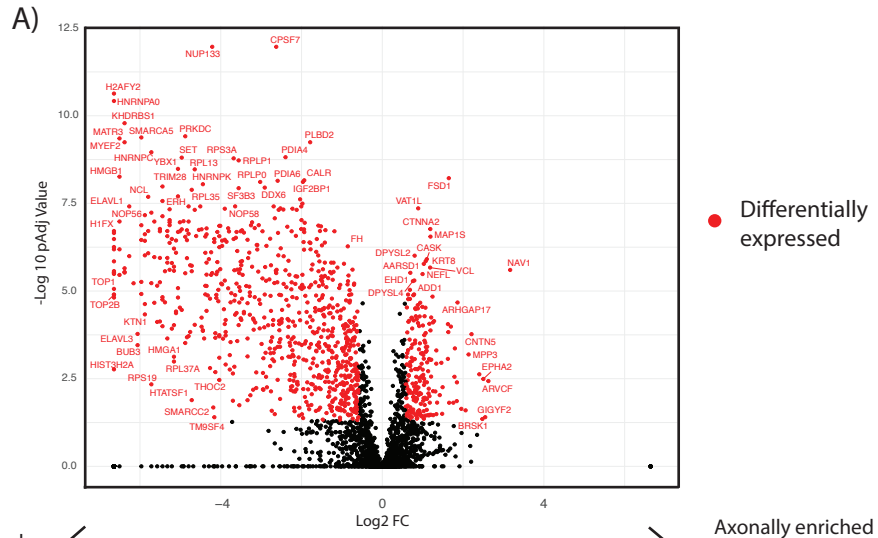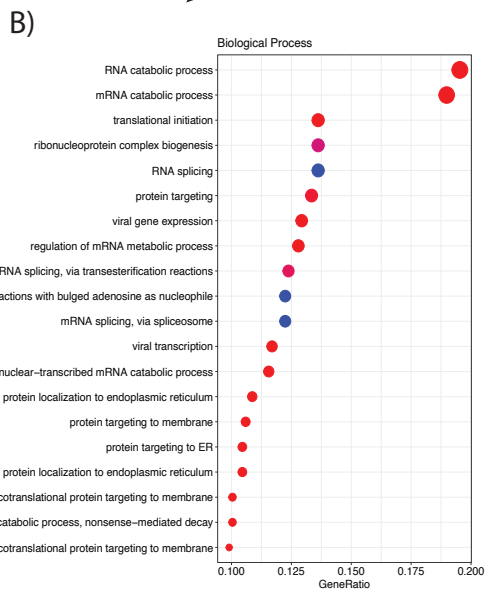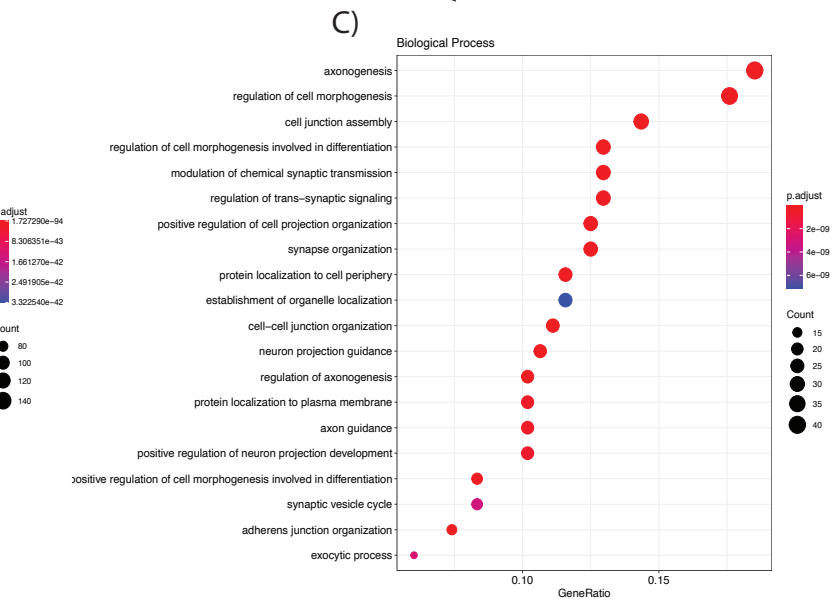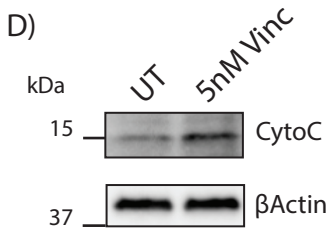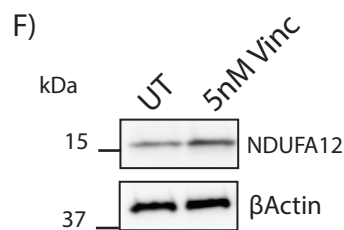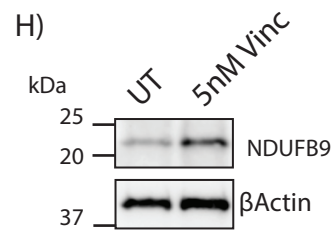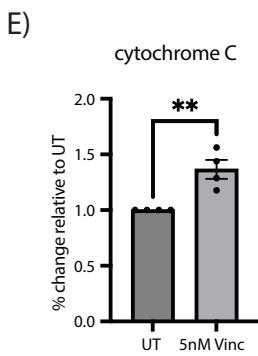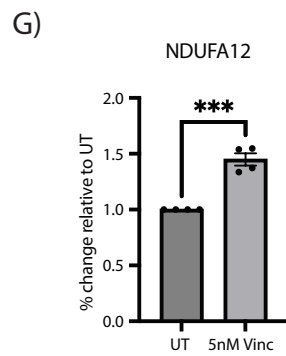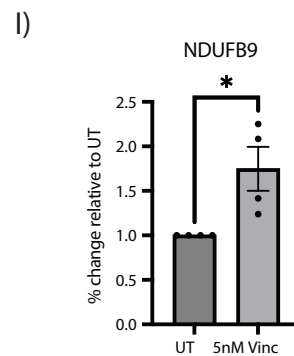

**Supplementary Figure 2: Mass spectrometry of  $i^3$ Neuron cell bodies and axons reveals differences in protein composition.**

- A) Volcano plot showing the significant proteins up- and down-regulated in axons versus cell bodies of  $i^3$ Neurons. (>2 unique peptides detected, Fold Change (FC) >1.5, p. adj. value <0.05.)
- B) Dot plot showing top 20 enriched biological process gene ontology analysis categories for proteins enriched in the cell body of  $i^3$ Neurons ranked by gene ratio.
- C) Dot plot showing top 20 enriched biological process gene ontology analysis categories for proteins enriched in the axons of  $i^3$ Neurons ranked by gene ratio.
- D) Representative western blots of  $i^3$ Neurons isolated axons using boyden chambers untreated (UT) and treated with 5 nM vincristine for 4 hours. Immunoblot for cytochrome C and loading control  $\beta$  actin. Uncropped western blots presented in Sup Fig 5.
- E) Quantification of relative cytochrome C levels after 5 nM vincristine for 4 hours in the axons of  $i^3$ Neurons. Results normalized to UT. Results are represented as mean  $\pm$  SEM. N=4 independent differentiations. Unpaired t-test. (p<0.005 \*\*).
- F) Representative western blots of  $i^3$ Neurons isolated axons using boyden chambers untreated (UT) and treated with 5 nM vincristine for 4 hours. Immunoblot for NDUFA12 and loading control  $\beta$  actin. Uncropped western blots presented in Sup Fig 5.
- G) Quantification of relative NDUFA12 levels after 5 nM vincristine for 4 hours in the axons of  $i^3$ Neurons. Results normalized to UT. Results are represented as mean  $\pm$  SEM. N=4 independent differentiations. Unpaired t-test. (p<0.001 \*\*\*).
- H) Representative western blots of  $i^3$ Neurons isolated axons using boyden chambers untreated (UT) and treated with 5 nM vincristine for 4 hours. Immunoblot for NDUF9 and loading control  $\beta$  actin. Uncropped western blots presented in Sup Fig 5.
- I) Quantification of relative NDUF9 levels after 5 nM vincristine for 4 hours in the axons of  $i^3$ Neurons. Results normalized to UT. Results are represented as mean  $\pm$  SEM. N=4 independent differentiations. Unpaired t-test. (p<0.05 \*).

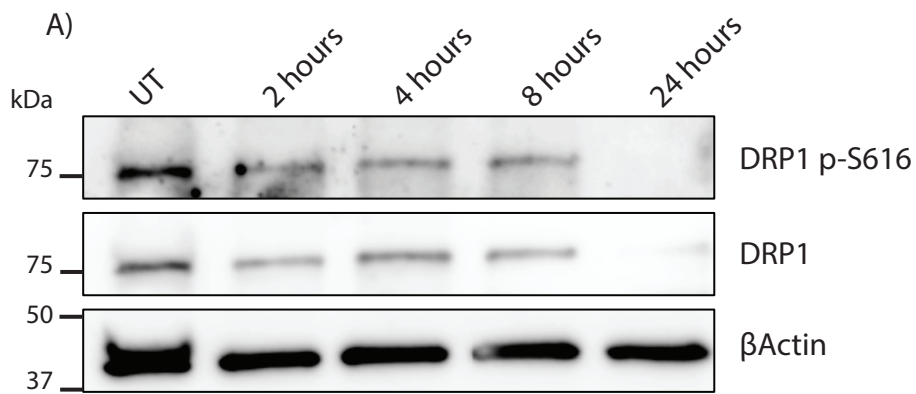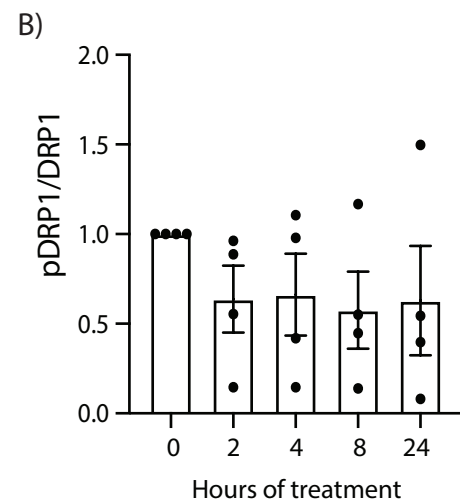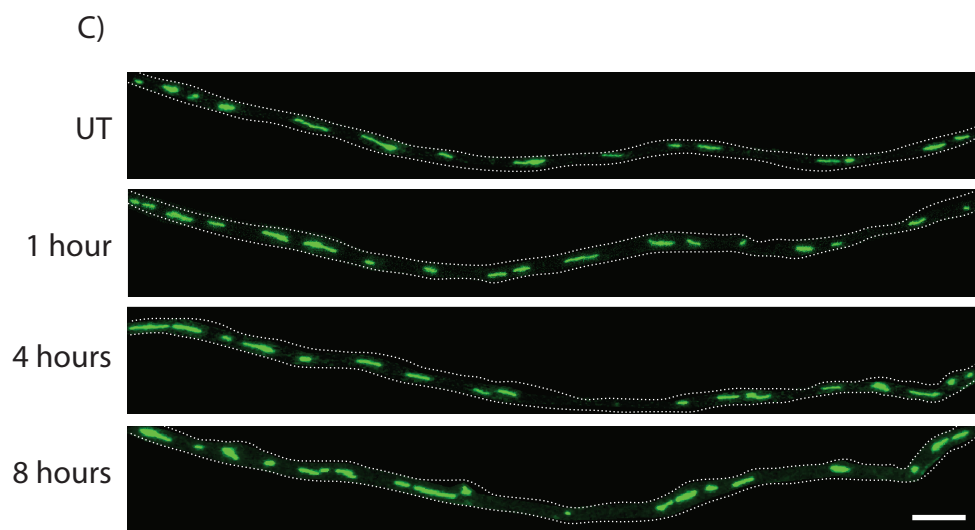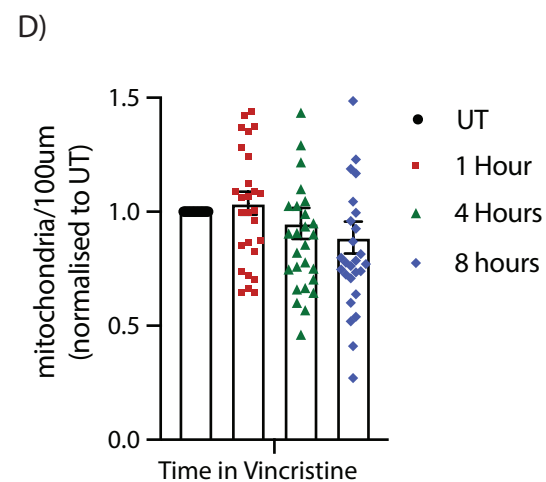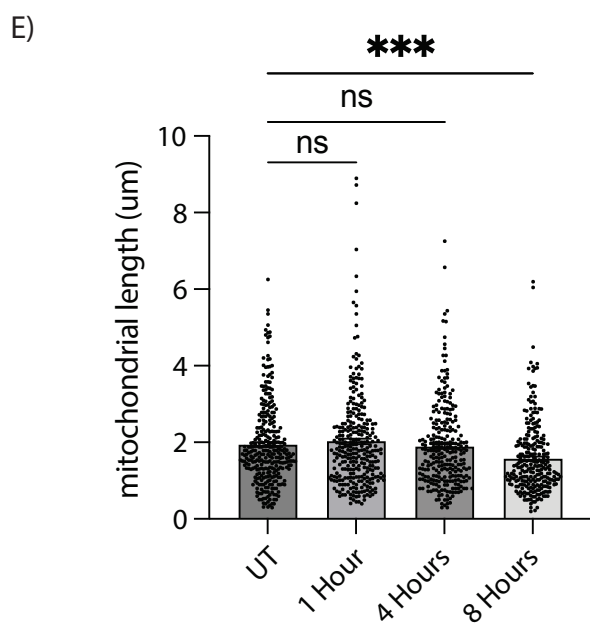

**Supplementary Figure 3: Vincristine does not induce mitochondrial fission in i<sup>3</sup>Neurons.**

- A) Representative western blots of i<sup>3</sup>Neurons treated with 5 nM vincristine for 2, 4, 8, and 24 hours. Immunoblot for p-S616 DRP1, total DRP1, and loading control  $\beta$  actin. Uncropped western blots presented in Sup Fig 5.
- B) Quantification of pDRP1 (S616)/ total DRP1 levels in 5 nM i<sup>3</sup>Neurons treated with 5 nM vincristine for 2, 4, 8, and 24 hours. Results normalized to UT. Results are represented as mean  $\pm$  SEM. N=4 independent differentiations. One-way ANOVA. No significant changes observed.
- C) Representative images of mitoGFP transduced neurons treated with 5 nM vincristine for 0, 2, 4, and 8 hours. Dotted line represents the axon. Scale bar = 10  $\mu$ m.
- D) Quantification of the number of axonal mitochondrial particles per 100  $\mu$ m 0, 1, 4, and 8 hours after 5 nM vincristine. N=28 axons from 3 different differentiations.
- E) Quantification of axon mitochondrial length 0, 1, 4 and 8 hours after 5nM vincristine. N=28 axons from 3 different differentiations. One-way ANOVA, Bonferroni correction (p<0.001 \*\*\*)

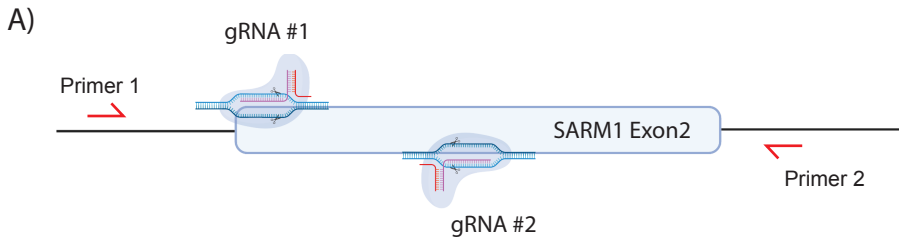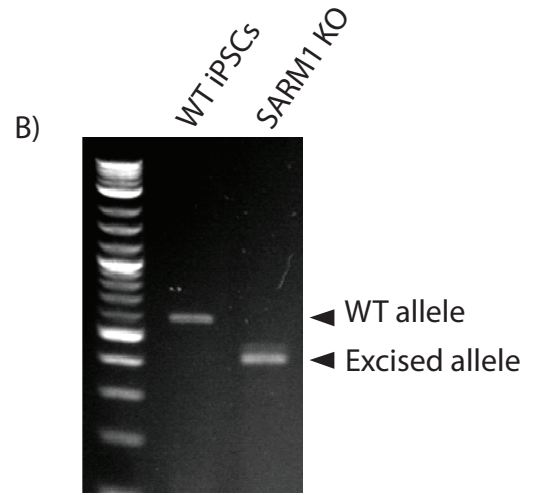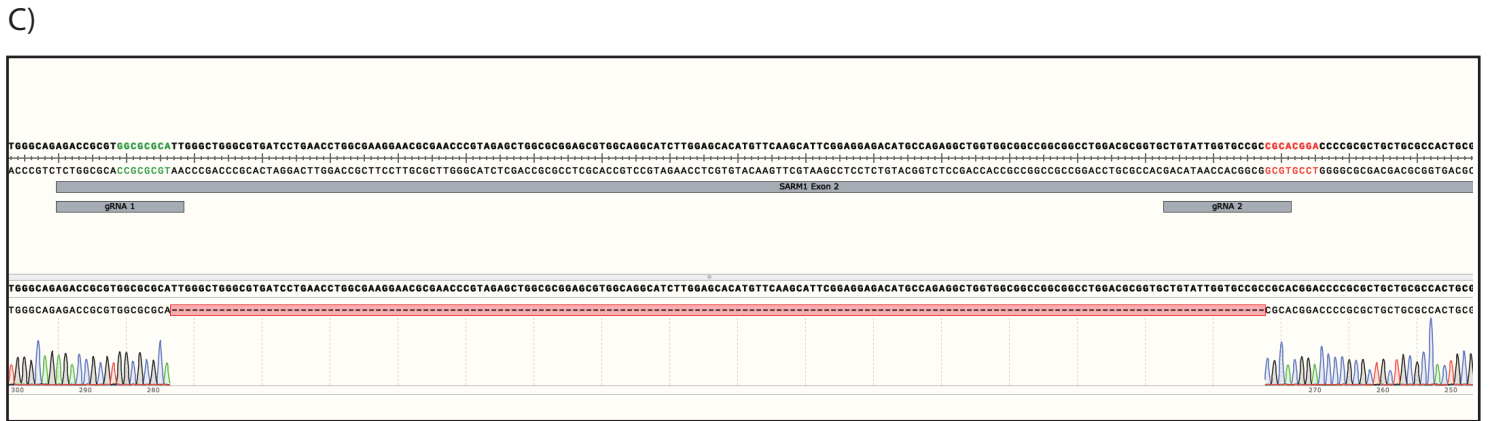

#### Supplementary Figure 4: SARM1 knockout generation

- A) Schematic representation of SARM1 knockout (KO) generation strategy. WT i<sup>3</sup> iPSCs were transfected with two gRNAs targeting *SARM1* exon 2. Primers used for knockout validation flanking *SARM1* exon 2 are shown in red.
- B) PCR of WT and SARM1 KOs using KO primers. SARM1 KOs contain a 161 base pair deletion in exon 2 of the *SARM1* gene, producing a shorter gene product on the agarose gel.
- C) Sanger sequencing of the *SARM1* deleted allele confirms a 161 base pair deletion resulting in a premature stop codon.
